# Supplementary material for: New evidence disclosed for networking in natural rubber by dielectric relaxation spectroscopy
Source: Royal Society of Chemistry journal article supplement (doi:10.1039/c4sm02521k), 2015-01-01
Supplement: c4sm02521k1.pdf [file c4sm02521k1.pdf]

# Disclosed New Evidence for Networking in Natural Rubber by Dielectric Relaxation Spectroscopy

*Jie Liu,<sup>a</sup> Siwu Wu,<sup>a</sup> Zhenghai Tang,<sup>a</sup> Tengfei Lin,<sup>a</sup> Baochun Guo<sup>\*a</sup> and Guangsu Huang<sup>\*b</sup>*

<sup>a</sup>Department of Polymer Materials and Engineering, South China University of Technology, Guangzhou, 510640, P, R, China.

<sup>b</sup>College of Polymer Science and Engineering, State Key Laboratory of Polymer Materials Engineering, Sichuan University, Chengdu, 610065, P, R, China

E-mail: [psbcguo@scut.edu.cn](mailto:psbcguo@scut.edu.cn) (BCG), [guangsu-huang@hotmail.com](mailto:guangsu-huang@hotmail.com) (GSH)

## Supporting Information

### Stress-strain curves of NR, DPNR and TE-DPNR

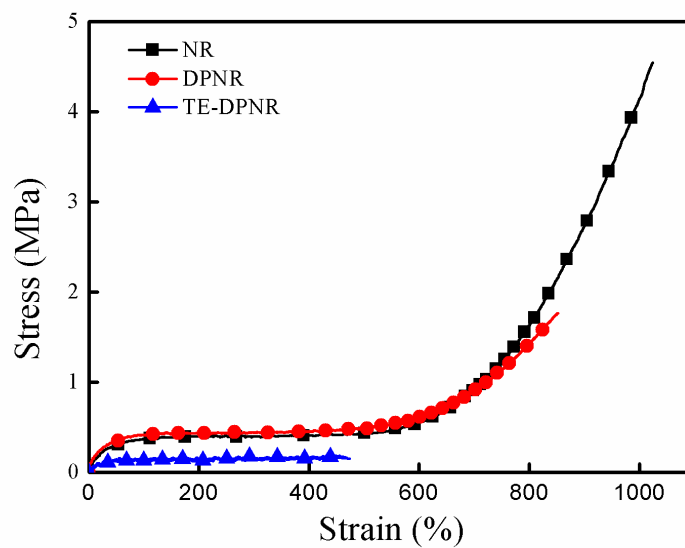

Fig. S1 Stress-strain curves of NR, DPNR and TE-DPNR

### SAXS curves of NR and DPNR

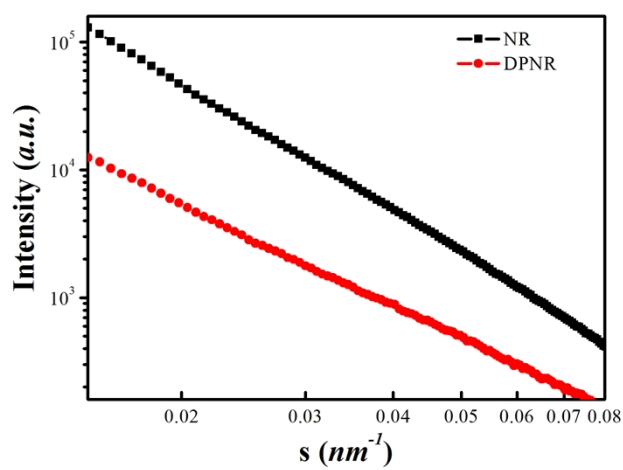

Fig. S2 SAXS curves of NR and DPNR

$\epsilon'(T)$  of NR, DPNR and TE-DPNR

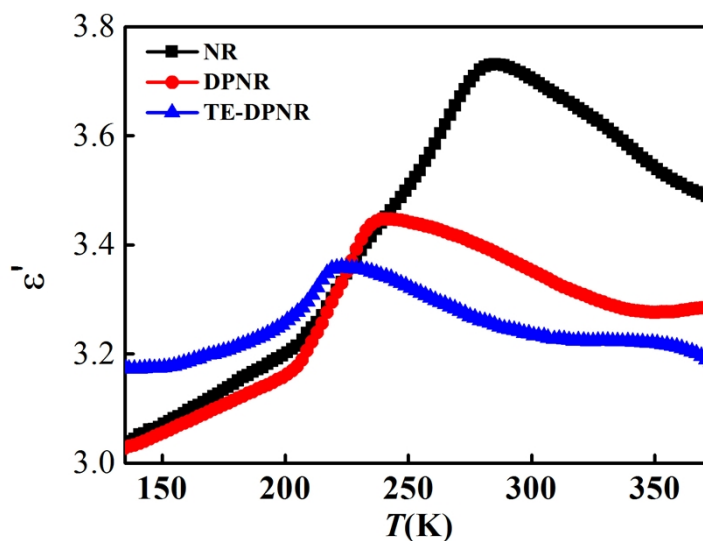

Fig. S3  $\epsilon'(T)$  of NR, DPNR and TE-DPNR at 7 Hz.

Dielectric loss spectra of (a) NR and (b) DPNR (c) TE-DPNR using a HN function for fitting at 223K

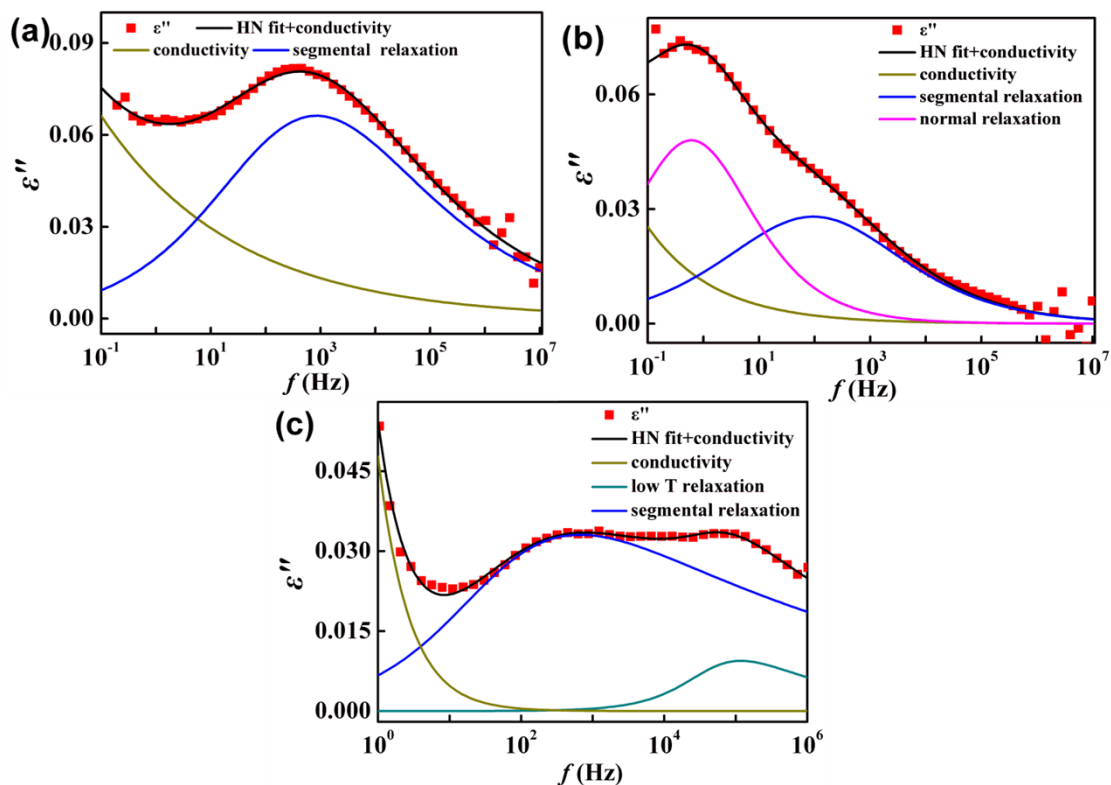

Fig. S4 Dielectric loss spectra of (a) NR and (b) DPNR (c) TE-DPNR using a HN function for fitting at 223K

### Dielectric loss spectra of NR using a HN function for fitting at 283K

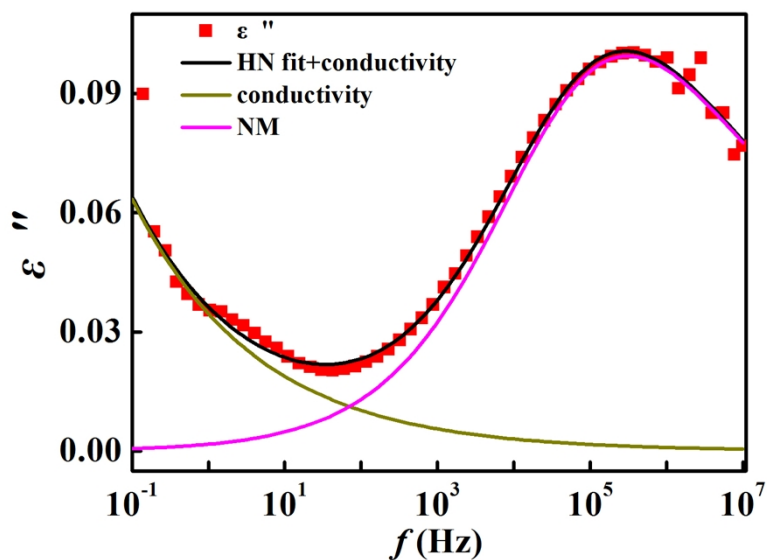

Fig. S5 Dielectric loss spectra of NR using a HN function for fitting at 283K

### Activation plot for SM, NM and the new mode relaxation for DPNR

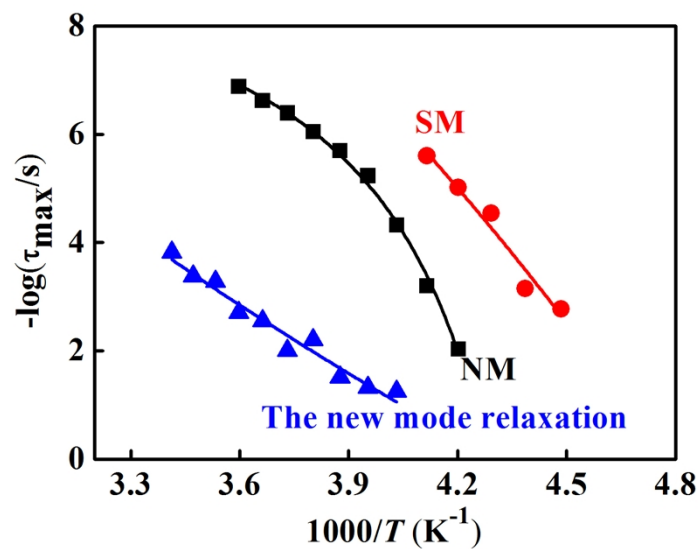

Fig.S6 Activation plot for SM, NM and the new mode relaxation for DPNR. The lines represent fits of Equation 6.

### Dielectric loss $\epsilon''$ vs. frequency of TE-DPNR

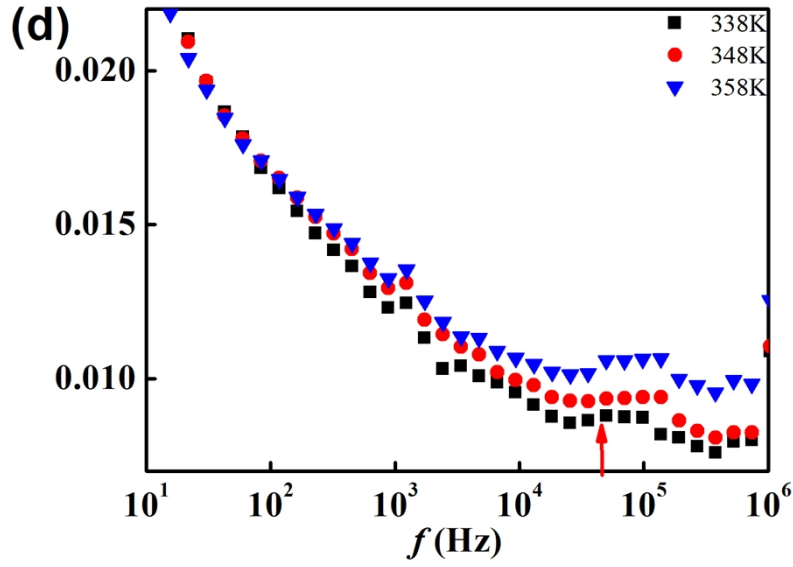

Fig.S7 Dielectric loss  $\epsilon''$  vs. frequency of TE-DPNR at 338K to 358K. The red arrows indicate the emerging of NM peaks at 338K.

**Table S1** The peak value of  $\epsilon''$  for NM modes in Fig. 3.

| Sample  | Relaxation mode | Peak value of $\epsilon''$ |
|---------|-----------------|----------------------------|
| NR      | NM              | 0.0735                     |
| DPNR    | NM              | 0.0523                     |
| TE-DPNR | NM              | 0.0196                     |

**Table S2** Fitting parameters for SM and NM in the typical spectra illustrated in Fig. S4, Fig. S5, Fig. 6(b) and Fig.8.

| Sample  | Mode         | $T/K$ | $\alpha$ | $\beta$ | $\tau_{\theta}/s$      | $\tau_{max}/s$         |
|---------|--------------|-------|----------|---------|------------------------|------------------------|
| NR      | SM           | 223   | 0.3713   | 0.6208  | $6.568 \times 10^{-4}$ | $1.886 \times 10^{-4}$ |
| DPNR    | SM           | 223   | 0.3851   | 1       | $1.675 \times 10^{-3}$ | $1.675 \times 10^{-3}$ |
| TE-DPNR | SM           | 223   | 0.5218   | 0.2061  | $4.239 \times 10^{-3}$ | $2.372 \times 10^{-4}$ |
| NR      | NM           | 283   | 0.4535   | 0.3442  | $4.940 \times 10^{-6}$ | $5.156 \times 10^{-7}$ |
| DPNR    | NM           | 283   | 0.7090   | 0.7585  | $1.212 \times 10^{-7}$ | $8.550 \times 10^{-8}$ |
| DPNR    | The new mode | 283   | 0.4156   | 0.9740  | $5.529 \times 10^{-4}$ | $5.201 \times 10^{-4}$ |
| TE-DPNR | LTM          | 173   | 0.3816   | 1       | $3.944 \times 10^{-3}$ | $3.944 \times 10^{-3}$ |
